# Supplementary material
Source: bioRxiv or medRxiv preprint supplement (https://www.biorxiv.org/highwire/filestream/30779/field_highwire_adjunct_files/4/106948-5.pdf)
Supplement: Supplementary file [file 106948-5.pdf]

**Supplementary Table S5.** Enrichment and depletion levels within genes on chrX

### Germ Layers

| Name     | Enrichment ratio | Observed | Expected    |
|----------|------------------|----------|-------------|
| ectoderm | 1.007903937      | 190      | 188.5100287 |
| mesoderm | 0.991237984      | 193      | 194.7060172 |
| endoderm | 0.98044949       | 147      | 149.9312321 |

### Organs

| Name            | Enrichment ratio | Observed | Expected    |
|-----------------|------------------|----------|-------------|
| salivary gland  | 2.890366192      | 37       | 12.80114613 |
| cheek           | 1.946974685      | 61       | 31.33065903 |
| lips            | 1.722014845      | 92       | 53.42578797 |
| chin            | 1.697024654      | 74       | 43.60573066 |
| urinary bladder | 1.695136896      | 65       | 38.34498567 |
| testis          | 1.661298817      | 94       | 56.58223496 |
| teeth           | 1.639326492      | 78       | 47.58051576 |
| vas deferens    | 1.603860294      | 15       | 9.35243553  |
| scalp           | 1.596732026      | 21       | 13.15186246 |
| forehead        | 1.551775245      | 81       | 52.1982808  |
| sinuses         | 1.542510447      | 11       | 7.131232092 |
| anus            | 1.523775502      | 22       | 14.43782235 |
| vertebrae       | 1.472860667      | 104      | 70.61088825 |
| nose            | 1.46558129       | 104      | 70.96160458 |
| rib             | 1.463926174      | 102      | 69.6756447  |
| rib cage        | 1.463926174      | 102      | 69.6756447  |
| sternum         | 1.454867808      | 83       | 57.04985673 |
| pelvis          | 1.430150925      | 106      | 74.11805158 |
| hair            | 1.42039288       | 90       | 63.36275072 |
| spinal column   | 1.406674651      | 105      | 74.64412607 |
| chest wall      | 1.38991984       | 94       | 67.62979943 |
| maxilla         | 1.384585384      | 118      | 85.22406877 |
| mandible        | 1.381742293      | 118      | 85.39942693 |

|                 |             |     |             |
|-----------------|-------------|-----|-------------|
| jaw             | 1.377029666 | 118 | 85.69169054 |
| breast          | 1.375022906 | 43  | 31.2722063  |
| elbow           | 1.372589565 | 97  | 70.66934097 |
| hip             | 1.371920059 | 100 | 72.89054441 |
| outer ear       | 1.367260191 | 80  | 58.51117479 |
| knee            | 1.349894225 | 98  | 72.5982808  |
| ankle           | 1.347723977 | 98  | 72.71518625 |
| wrist           | 1.346190935 | 96  | 71.31232092 |
| fallopian tube  | 1.334654429 | 11  | 8.241833811 |
| duodenum        | 1.31140261  | 22  | 16.77593123 |
| pituitary gland | 1.301683717 | 42  | 32.26590258 |
| vulva           | 1.300826782 | 33  | 25.36848138 |
| penis           | 1.294647589 | 56  | 43.25501433 |
| shoulder        | 1.294210356 | 96  | 74.1765043  |
| rectum          | 1.293870489 | 36  | 27.8234957  |
| fingers         | 1.290228815 | 131 | 101.5323782 |
| urethra         | 1.276704712 | 35  | 27.41432665 |
| digit           | 1.269384651 | 132 | 103.9873926 |
| hand            | 1.243704267 | 135 | 108.5467049 |
| cranial nerve   | 1.227885002 | 119 | 96.91461318 |
| eyelid          | 1.225041224 | 86  | 70.2017192  |
| diaphragm       | 1.218362716 | 24  | 19.69856734 |
| cerebellum      | 1.212366836 | 90  | 74.23495702 |
| toes            | 1.209140782 | 121 | 100.0710602 |
| upper limb      | 1.20369555  | 141 | 117.139255  |
| mouth           | 1.200394399 | 135 | 112.4630372 |
| face            | 1.196884084 | 126 | 105.2733524 |
| vagina          | 1.189315298 | 39  | 32.79197708 |
| pharynx         | 1.188762514 | 46  | 38.69570201 |
| hypothalamus    | 1.188044662 | 15  | 12.62578797 |
| prostate        | 1.162668951 | 28  | 24.08252149 |
| skull           | 1.15941708  | 135 | 116.4378223 |
| foot            | 1.155698718 | 132 | 114.2166189 |

|                           |             |     |              |
|---------------------------|-------------|-----|--------------|
| cerebrospinal fluid       | 1.14663828  | 25  | 21.80286533  |
| lung                      | 1.143244887 | 112 | 97.96676218  |
| meninges                  | 1.136314304 | 36  | 31.68137536  |
| peripheral nervous system | 1.125927519 | 144 | 127.89455559 |
| lower limb                | 1.124987336 | 140 | 124.4458453  |
| aorta                     | 1.124229692 | 23  | 20.45845272  |
| ear                       | 1.105259824 | 140 | 126.6670487  |
| ovary                     | 1.102770376 | 37  | 33.55186246  |
| small intestine           | 1.099376616 | 57  | 51.84756447  |
| lymph nodes               | 1.087362911 | 15  | 13.79484241  |
| peripheral nerve          | 1.085199005 | 102 | 93.99197708  |
| brain                     | 1.081564655 | 181 | 167.3501433  |
| large intestine           | 1.076838857 | 62  | 57.57593123  |
| eye                       | 1.067840056 | 143 | 133.9151862  |
| esophagus                 | 1.057575758 | 51  | 48.2234957   |
| lacrimial apparatus       | 1.052790347 | 8   | 7.598853868  |
| skin                      | 1.049966338 | 143 | 136.1948424  |
| uterus                    | 1.046597463 | 52  | 49.68481375  |
| intestine                 | 1.044981693 | 70  | 66.98681948  |
| head                      | 1.042690214 | 189 | 181.2618911  |
| vocal cords               | 1.041346974 | 21  | 20.16618911  |
| nail                      | 1.03588775  | 33  | 31.85673352  |
| ureter                    | 1.022166728 | 38  | 37.17593123  |
| abdominal wall            | 1.017082138 | 39  | 38.34498567  |
| arm                       | 0.998335674 | 66  | 66.11002865  |
| radius                    | 0.989104421 | 54  | 54.59484241  |
| heart valve               | 0.984997029 | 57  | 57.86819484  |
| humerus                   | 0.975058417 | 55  | 56.40687679  |
| stomach                   | 0.962853483 | 56  | 58.16045845  |
| femur                     | 0.959155324 | 55  | 57.34212034  |
| larynx                    | 0.954222326 | 28  | 29.34326648  |
| thyroid                   | 0.953747353 | 16  | 16.77593123  |
| ulna                      | 0.941383961 | 52  | 55.23782235  |

|                    |             |    |             |
|--------------------|-------------|----|-------------|
| thymus             | 0.939991381 | 5  | 5.319197708 |
| scapula            | 0.938172043 | 51 | 54.36103152 |
| neck               | 0.937261373 | 83 | 88.55587393 |
| tibia              | 0.933834232 | 50 | 53.54269341 |
| thigh              | 0.930820734 | 58 | 62.31060172 |
| spinal cord        | 0.930771542 | 71 | 76.28080229 |
| clavicle           | 0.929579773 | 52 | 55.93925501 |
| shin               | 0.917981827 | 55 | 59.91404011 |
| fibula             | 0.907377316 | 48 | 52.89971347 |
| heart              | 0.906114893 | 92 | 101.5323782 |
| forearm            | 0.901244971 | 57 | 63.24584527 |
| epiglottis         | 0.900412797 | 9  | 9.995415473 |
| trachea            | 0.895177839 | 18 | 20.10773639 |
| tongue             | 0.89476167  | 25 | 27.94040115 |
| pancreas           | 0.891033497 | 40 | 44.89169054 |
| bone marrow        | 0.8842256   | 23 | 26.01146132 |
| lymph vessels      | 0.87284914  | 5  | 5.728366762 |
| olfactory bulb     | 0.850666233 | 9  | 10.57994269 |
| blood              | 0.841369335 | 93 | 110.5340974 |
| sweat gland        | 0.839076775 | 18 | 21.452149   |
| appendix           | 0.814659197 | 2  | 2.455014327 |
| blood vessels      | 0.806973733 | 85 | 105.3318052 |
| kidney             | 0.805804206 | 65 | 80.66475645 |
| adrenal gland      | 0.794626594 | 17 | 21.39369628 |
| red blood cells    | 0.787861197 | 42 | 53.30888252 |
| coagulation system | 0.785664438 | 40 | 50.91232092 |
| middle ear         | 0.783565335 | 24 | 30.62922636 |
| inner ear          | 0.777629234 | 12 | 15.43151862 |
| biliary tract      | 0.760348584 | 18 | 23.67335244 |
| white blood cells  | 0.75832638  | 50 | 65.93467049 |
| bronchus           | 0.758242355 | 16 | 21.10143266 |
| liver              | 0.7538528   | 49 | 64.99942693 |
| spleen             | 0.724141508 | 24 | 33.14269341 |

|             |             |    |             |
|-------------|-------------|----|-------------|
| placenta    | 0.589925625 | 10 | 16.9512894  |
| parathyroid | 0.518419489 | 2  | 3.857879656 |
| gallbladder | 0.163711418 | 2  | 12.21661891 |

### Body Regions

| Name          | Enrichment ratio | Observed | Expected    |
|---------------|------------------|----------|-------------|
| pelvis        | 1.215957261      | 144      | 118.4252149 |
| limbs         | 1.160115945      | 150      | 129.2974212 |
| thorax        | 1.021765091      | 152      | 148.7621777 |
| head and neck | 1.017049498      | 190      | 186.8148997 |
| non-specific  | 0.975772826      | 184      | 188.5684814 |
| abdomen       | 0.841369335      | 108      | 128.3621777 |

### Body Systems

| Name            | Enrichment ratio | Observed | Expected    |
|-----------------|------------------|----------|-------------|
| reproductive    | 1.38100891       | 116      | 83.9965616  |
| urinary         | 1.141986962      | 104      | 91.06934097 |
| skeleton        | 1.122881009      | 157      | 139.8189112 |
| digestive       | 1.079621169      | 130      | 120.4126074 |
| skeletal muscle | 1.07220913       | 158      | 147.3593123 |
| respiratory     | 1.064209793      | 119      | 111.8200573 |
| nervous         | 1.047650109      | 185      | 176.5856734 |
| integumentary   | 1.038357997      | 145      | 139.643553  |
| endocrine       | 0.9978234        | 62       | 62.13524355 |
| cardiovascular  | 0.866611683      | 112      | 129.2389685 |
| lymphatic       | 0.839648743      | 40       | 47.63896848 |
| immune          | 0.740688338      | 72       | 97.20687679 |

| P-value     | FDR         |
|-------------|-------------|
| 0.356771991 | 0.716422019 |
| 0.270554313 | 0.470160296 |
| 0.313440197 | 0.470160296 |

| P-value     | FDR         |
|-------------|-------------|
| 2.07941E-09 | 1.29963E-07 |
| 4.83264E-08 | 1.5102E-06  |
| 1.61745E-09 | 1.29963E-07 |
| 3.58773E-07 | 8.96932E-06 |
| 2.84372E-06 | 2.36977E-05 |
| 6.90363E-09 | 2.87651E-07 |
| 6.29626E-07 | 1.12433E-05 |
| 0.041361897 | 0.101377199 |
| 0.018807398 | 0.052242771 |
| 3.55153E-06 | 2.77463E-05 |
| 0.088522351 | 0.197594533 |
| 0.026149713 | 0.068098212 |
| 5.50984E-07 | 1.12433E-05 |
| 7.23331E-07 | 1.1302E-05  |
| 1.1249E-06  | 1.40613E-05 |
| 1.1249E-06  | 1.40613E-05 |
| 3.54792E-05 | 0.000211186 |
| 1.89168E-06 | 1.73646E-05 |
| 3.41688E-05 | 0.000211186 |
| 5.40845E-06 | 3.9768E-05  |
| 4.95199E-05 | 0.00026913  |
| 1.39706E-06 | 1.58757E-05 |
| 1.5825E-06  | 1.64844E-05 |

|             |             |
|-------------|-------------|
| 1.94483E-06 | 1.73646E-05 |
| 0.013294066 | 0.038645539 |
| 5.73896E-05 | 0.000298904 |
| 3.91701E-05 | 0.000222558 |
| 0.000505804 | 0.002107516 |
| 0.000105038 | 0.000504992 |
| 0.000112645 | 0.000521506 |
| 0.000150388 | 0.000671374 |
| 0.173754948 | 0.344751881 |
| 0.097501776 | 0.210133138 |
| 0.03325922  | 0.084844948 |
| 0.056329642 | 0.13285293  |
| 0.015551137 | 0.044179366 |
| 0.000735134 | 0.002871618 |
| 0.050750957 | 0.121997493 |
| 1.26181E-05 | 8.76257E-05 |
| 0.062688008 | 0.14511113  |
| 3.02625E-05 | 0.000199096 |
| 7.10201E-05 | 0.0003551   |
| 0.000828927 | 0.003139874 |
| 0.009735057 | 0.030422055 |
| 0.155481469 | 0.313470703 |
| 0.010516323 | 0.03206196  |
| 0.001429749 | 0.005256429 |
| 0.0002529   | 0.001090084 |
| 0.00057149  | 0.002304395 |
| 0.001525066 | 0.005446664 |
| 0.118270893 | 0.250573925 |
| 0.09589364  | 0.210133138 |
| 0.243956185 | 0.44194961  |
| 0.195812221 | 0.377987738 |
| 0.003564479 | 0.012376663 |
| 0.005135858 | 0.016894271 |

|             |             |
|-------------|-------------|
| 0.231192514 | 0.431329316 |
| 0.022839777 | 0.062064612 |
| 0.19887429  | 0.377987738 |
| 0.008281057 | 0.02654185  |
| 0.011004855 | 0.032752545 |
| 0.271767886 | 0.478464589 |
| 0.024382238 | 0.064846379 |
| 0.252504797 | 0.450901422 |
| 0.199577526 | 0.377987738 |
| 0.358885343 | 0.598142239 |
| 0.126385132 | 0.263302359 |
| 0.004552968 | 0.015381649 |
| 0.240898971 | 0.44194961  |
| 0.085906495 | 0.195242035 |
| 0.317847453 | 0.551035669 |
| 0.424538155 | 0.680349607 |
| 0.152018185 | 0.311512674 |
| 0.346965974 | 0.586091172 |
| 0.321804831 | 0.551035669 |
| 0.038581108 | 0.096452769 |
| 0.412118111 | 0.669022908 |
| 0.404707895 | 0.665637986 |
| 0.433207369 | 0.685454697 |
| 0.446067268 | 0.696980107 |
| 0.496420175 | 0.999999999 |
| 0.465887981 | 0.999999999 |
| 0.448865041 | 0.999999999 |
| 0.414448116 | 0.999999999 |
| 0.368738166 | 0.999999999 |
| 0.357278005 | 0.999999999 |
| 0.399437064 | 0.999999999 |
| 0.431983427 | 0.999999999 |
| 0.30294194  | 0.999999999 |



|             |             |
|-------------|-------------|
| 0.467471053 | 0.999999999 |
| 0.295039073 | 0.999999999 |
| 0.210236761 | 0.999999999 |
| 0.28389679  | 0.999999999 |
| 0.252004382 | 0.999999999 |
| 0.216779182 | 0.999999999 |
| 0.264829192 | 0.999999999 |
| 0.220007595 | 0.999999999 |
| 0.211911311 | 0.999999999 |
| 0.08494206  | 0.92060222  |
| 0.165767074 | 0.999999999 |
| 0.38629402  | 0.999999999 |
| 0.31377776  | 0.999999999 |
| 0.274363514 | 0.999999999 |
| 0.199113886 | 0.999999999 |
| 0.263081623 | 0.999999999 |
| 0.39840601  | 0.999999999 |
| 0.317143852 | 0.999999999 |
| 0.005735904 | 0.155870447 |
| 0.212673384 | 0.999999999 |
| 0.418433504 | 0.999999999 |
| 0.001690338 | 0.105646115 |
| 0.009918317 | 0.206631595 |
| 0.151412697 | 0.999999999 |
| 0.029867191 | 0.4215065   |
| 0.032522193 | 0.4215065   |
| 0.088377813 | 0.92060222  |
| 0.177698896 | 0.999999999 |
| 0.09878067  | 0.949814136 |
| 0.006234818 | 0.155870447 |
| 0.112163929 | 0.999999999 |
| 0.005865777 | 0.155870447 |
| 0.03372052  | 0.4215065   |

|             |             |
|-------------|-------------|
| 0.029298134 | 0.4215065   |
| 0.170871859 | 0.999999999 |
| 0.000142112 | 0.017764033 |

| P-value     | FDR         |
|-------------|-------------|
| 9.05755E-05 | 0.000543453 |
| 0.000930505 | 0.002791516 |
| 0.30493994  | 0.45740991  |
| 0.215817543 | 0.431635085 |
| 0.110931528 | 0.332794583 |
| 0.00136147  | 0.008168822 |

| P-value     | FDR         |
|-------------|-------------|
| 2.32963E-06 | 2.79556E-05 |
| 0.032367608 | 0.105579333 |
| 0.00365512  | 0.021930717 |
| 0.082062175 | 0.164124351 |
| 0.043991389 | 0.105579333 |
| 0.152072748 | 0.260696139 |
| 0.037838251 | 0.105579333 |
| 0.206968164 | 0.310452246 |
| 0.495143978 | 0.99999823  |
| 0.005423329 | 0.032539972 |
| 0.095380808 | 0.381523231 |
| 0.000125563 | 0.00150676  |

**Supplementary Table S5.** Enrichment and depletion levels within genes on chr9**Germ Layers**

| Name     | Enrichment ratio | Observed | Expected    |
|----------|------------------|----------|-------------|
| endoderm | 1.045852608      | 103      | 98.48424069 |
| mesoderm | 1.016457789      | 130      | 127.8951289 |
| ectoderm | 1.001411547      | 124      | 123.8252149 |

**Organs**

| Name               | Enrichment ratio | Observed | Expected    |
|--------------------|------------------|----------|-------------|
| appendix           | 3.100568586      | 5        | 1.61260745  |
| parathyroid        | 1.57847128       | 4        | 2.534097421 |
| gallbladder        | 1.495393844      | 12       | 8.024641834 |
| fallopian tube     | 1.477717794      | 8        | 5.413753582 |
| biliary tract      | 1.414777962      | 22       | 15.55014327 |
| abdominal wall     | 1.389584092      | 35       | 25.18739255 |
| rib                | 1.354677953      | 62       | 45.76733524 |
| rib cage           | 1.354677953      | 62       | 45.76733524 |
| placenta           | 1.347143592      | 15       | 11.13467049 |
| spinal column      | 1.346088664      | 66       | 49.03094556 |
| vertebrae          | 1.315174953      | 61       | 46.38166189 |
| vas deferens       | 1.302238806      | 8        | 6.143266476 |
| bronchus           | 1.298631496      | 18       | 13.86074499 |
| pelvis             | 1.294022788      | 63       | 48.68538682 |
| thyroid            | 1.270476884      | 14       | 11.01948424 |
| breast             | 1.265727438      | 26       | 20.54154728 |
| prostate           | 1.26430952       | 20       | 15.81891117 |
| vulva              | 1.260231103      | 21       | 16.66361032 |
| scapula            | 1.260231103      | 45       | 35.70773639 |
| vagina             | 1.253491899      | 27       | 21.53982808 |
| chest wall         | 1.238083567      | 55       | 44.4234957  |
| forearm            | 1.227618837      | 51       | 41.54383954 |
| coagulation system | 1.225988313      | 41       | 33.44240688 |
| arm                | 1.220489067      | 53       | 43.4252149  |
| shin               | 1.219657809      | 48       | 39.35530086 |
| peripheral nerve   | 1.214775006      | 75       | 61.73982808 |

|                     |             |    |             |
|---------------------|-------------|----|-------------|
| hypothalamus        | 1.205776672 | 10 | 8.293409742 |
| radius              | 1.199063569 | 43 | 35.86131805 |
| clavicle            | 1.197460971 | 44 | 36.74441261 |
| thigh               | 1.197180141 | 49 | 40.92951289 |
| tibia               | 1.194192792 | 42 | 35.17020057 |
| large intestine     | 1.189862868 | 45 | 37.81948424 |
| salivary gland      | 1.189259184 | 10 | 8.408595989 |
| cerebrospinal fluid | 1.18702733  | 17 | 14.32148997 |
| ulna                | 1.185106215 | 43 | 36.28366762 |
| intestine           | 1.181787398 | 52 | 44.00114613 |
| lung                | 1.181028034 | 76 | 64.35071633 |
| pharynx             | 1.180276863 | 30 | 25.41776504 |
| neck                | 1.169006453 | 68 | 58.16905444 |
| femur               | 1.16816529  | 44 | 37.66590258 |
| humerus             | 1.160544428 | 43 | 37.05157593 |
| pancreas            | 1.153023943 | 34 | 29.48767908 |
| fibula              | 1.151150326 | 40 | 34.747851   |
| liver               | 1.147656502 | 49 | 42.69570201 |
| spinal cord         | 1.137587922 | 57 | 50.10601719 |
| trachea             | 1.135673377 | 15 | 13.20802292 |
| pituitary gland     | 1.13238157  | 24 | 21.19426934 |
| sternum             | 1.1207793   | 42 | 37.4739255  |
| small intestine     | 1.115785223 | 38 | 34.05673352 |
| meninges            | 1.105221127 | 23 | 20.81031519 |
| spleen              | 1.102424386 | 24 | 21.77020057 |
| mouth               | 1.09647966  | 81 | 73.87277937 |
| kidney              | 1.094635518 | 58 | 52.98567335 |
| rectum              | 1.094318324 | 20 | 18.27621777 |
| tongue              | 1.089739587 | 20 | 18.3530086  |
| maxilla             | 1.089664845 | 61 | 55.98051576 |
| ovary               | 1.088980186 | 24 | 22.03896848 |
| mandible            | 1.08742734  | 61 | 56.09570201 |
| skull               | 1.085199005 | 83 | 76.48366762 |
| jaw                 | 1.083718515 | 61 | 56.28767908 |
| digit               | 1.08336899  | 74 | 68.30544413 |
| heart               | 1.079576212 | 72 | 66.69283668 |

|                           |             |     |             |
|---------------------------|-------------|-----|-------------|
| testis                    | 1.076230418 | 40  | 37.16676218 |
| skin                      | 1.073089488 | 96  | 89.46131805 |
| face                      | 1.070135165 | 74  | 69.15014327 |
| knee                      | 1.069471483 | 51  | 47.68710602 |
| wrist                     | 1.067408857 | 50  | 46.84240688 |
| upper limb                | 1.065704412 | 82  | 76.94441261 |
| ureter                    | 1.064723552 | 26  | 24.41948424 |
| eye                       | 1.057251933 | 93  | 87.96389685 |
| red blood cells           | 1.056641136 | 37  | 35.01661891 |
| penis                     | 1.055869302 | 30  | 28.41260745 |
| lips                      | 1.054329011 | 37  | 35.09340974 |
| nail                      | 1.051348761 | 22  | 20.92550143 |
| toes                      | 1.049701841 | 69  | 65.73295129 |
| ankle                     | 1.04681576  | 50  | 47.76389685 |
| shoulder                  | 1.046716771 | 51  | 48.72378223 |
| cerebellum                | 1.045892584 | 51  | 48.76217765 |
| hip                       | 1.044297358 | 50  | 47.87908309 |
| uterus                    | 1.041791045 | 34  | 32.63610315 |
| aorta                     | 1.041791045 | 14  | 13.43839542 |
| head                      | 1.041455092 | 124 | 119.0641834 |
| hand                      | 1.037863992 | 74  | 71.30028653 |
| larynx                    | 1.037640483 | 20  | 19.27449857 |
| elbow                     | 1.034035776 | 48  | 46.42005731 |
| foot                      | 1.026329458 | 77  | 75.02464183 |
| blood vessels             | 1.026181523 | 71  | 69.18853868 |
| heart valve               | 1.026006332 | 39  | 38.01146132 |
| peripheral nervous system | 1.023697782 | 86  | 84.00916905 |
| stomach                   | 1.020850521 | 39  | 38.2034384  |
| forehead                  | 1.020791897 | 35  | 34.28710602 |
| fingers                   | 1.019599756 | 68  | 66.69283668 |
| eyelid                    | 1.0192377   | 47  | 46.11289398 |
| brain                     | 1.018866547 | 112 | 109.9260745 |
| lower limb                | 1.015367035 | 83  | 81.74383954 |
| esophagus                 | 1.010221619 | 32  | 31.67621777 |
| blood                     | 1.005430279 | 73  | 72.60573066 |
| lymph nodes               | 0.993232988 | 9   | 9.061318052 |

|                    |             |    |             |
|--------------------|-------------|----|-------------|
| urinary bladder    | 0.992560066 | 25 | 25.18739255 |
| hair               | 0.985088396 | 41 | 41.62063037 |
| ear                | 0.973524165 | 81 | 83.20286533 |
| nose               | 0.965415919 | 45 | 46.61203438 |
| anus               | 0.94899994  | 9  | 9.483667622 |
| bone marrow        | 0.936441389 | 16 | 17.08595989 |
| diaphragm          | 0.927410426 | 12 | 12.93925501 |
| epiglottis         | 0.913851794 | 6  | 6.565616046 |
| cranial nerve      | 0.895387358 | 57 | 63.65959885 |
| middle ear         | 0.894667882 | 18 | 20.11919771 |
| outer ear          | 0.858618993 | 33 | 38.43381089 |
| white blood cells  | 0.8543056   | 37 | 43.31002865 |
| teeth              | 0.831897026 | 26 | 31.25386819 |
| vocal cords        | 0.830413152 | 11 | 13.24641834 |
| duodenum           | 0.81673514  | 9  | 11.01948424 |
| sweat gland        | 0.780633617 | 11 | 14.09111748 |
| chin               | 0.768076508 | 22 | 28.64297994 |
| olfactory bulb     | 0.719468954 | 5  | 6.949570201 |
| adrenal gland      | 0.711605905 | 10 | 14.05272206 |
| scalp              | 0.694527363 | 6  | 8.638968481 |
| inner ear          | 0.690581185 | 7  | 10.13638968 |
| cheek              | 0.680274003 | 14 | 20.57994269 |
| urethra            | 0.66639086  | 12 | 18.00744986 |
| sinuses            | 0.640445314 | 3  | 4.684240688 |
| lacrimal apparatus | 0.601033295 | 3  | 4.991404011 |
| thymus             | 0.572412662 | 2  | 3.493982808 |
| lymph vessels      | 0.531526043 | 2  | 3.762750716 |

## Body Regions

| Name          | Enrichment ratio | Observed | Expected    |
|---------------|------------------|----------|-------------|
| pelvis        | 1.182684799      | 92       | 77.78911175 |
| abdomen       | 1.102989153      | 93       | 84.31633238 |
| thorax        | 1.084772601      | 106      | 97.71633238 |
| non-specific  | 1.049541505      | 130      | 123.8636103 |
| limbs         | 1.024365064      | 87       | 84.93065903 |
| head and neck | 1.010498197      | 124      | 122.7117479 |

## Body Systems

| Name            | Enrichment ratio | Observed | Expected    |
|-----------------|------------------|----------|-------------|
| respiratory     | 1.157243058      | 85       | 73.4504298  |
| skeleton        | 1.077940149      | 99       | 91.84183381 |
| urinary         | 1.069875271      | 64       | 59.82005731 |
| endocrine       | 1.053551621      | 43       | 40.81432665 |
| cardiovascular  | 1.048387641      | 89       | 84.89226361 |
| integumentary   | 1.046587906      | 96       | 91.72664756 |
| digestive       | 1.024090711      | 81       | 79.09455587 |
| skeletal muscle | 1.022781767      | 99       | 96.79484241 |
| lymphatic       | 1.022616976      | 32       | 31.29226361 |
| nervous         | 1.017306714      | 118      | 115.9925501 |
| reproductive    | 0.99684251       | 55       | 55.17421203 |
| immune          | 0.971001876      | 62       | 63.85157593 |

| P-value     | FDR         |
|-------------|-------------|
| 0.190222334 | 0.317942317 |
| 0.211961545 | 0.317942317 |
| 0.489098795 | 0.489098795 |

| P-value     | FDR         |
|-------------|-------------|
| 0.032070506 | 0.392446224 |
| 0.218590461 | 0.487925136 |
| 0.092237197 | 0.43668842  |
| 0.152198795 | 0.464020717 |
| 0.050060352 | 0.415357536 |
| 0.01882639  | 0.336185533 |
| 0.001904872 | 0.079369652 |
| 0.001904872 | 0.079369652 |
| 0.125250328 | 0.43668842  |
| 0.001400244 | 0.079369652 |
| 0.004597181 | 0.142294532 |
| 0.23257102  | 0.501230646 |
| 0.129259772 | 0.43668842  |
| 0.005691781 | 0.142294532 |
| 0.182383438 | 0.468500584 |
| 0.101688316 | 0.43668842  |
| 0.138687783 | 0.444512126 |
| 0.135036232 | 0.444198133 |
| 0.03774725  | 0.392446224 |
| 0.105417672 | 0.43668842  |
| 0.027916958 | 0.387735529 |
| 0.040964409 | 0.392446224 |
| 0.069205736 | 0.43668842  |
| 0.04064692  | 0.392446224 |
| 0.053165765 | 0.415357536 |
| 0.010989783 | 0.228953807 |



|             |             |
|-------------|-------------|
| 0.272041252 | 0.548647921 |
| 0.084711803 | 0.43668842  |
| 0.082797525 | 0.43668842  |
| 0.067410004 | 0.43668842  |
| 0.092827205 | 0.43668842  |
| 0.086638518 | 0.43668842  |
| 0.285394907 | 0.548647921 |
| 0.228814387 | 0.501230646 |
| 0.098411603 | 0.43668842  |
| 0.072516889 | 0.43668842  |
| 0.022125435 | 0.345709929 |
| 0.158971953 | 0.468500584 |
| 0.043953977 | 0.392446224 |
| 0.113825492 | 0.43668842  |
| 0.127134063 | 0.43668842  |
| 0.174697264 | 0.468500584 |
| 0.151714203 | 0.464020717 |
| 0.122559542 | 0.43668842  |
| 0.110076153 | 0.43668842  |
| 0.298464469 | 0.548647921 |
| 0.252046383 | 0.533996575 |
| 0.191898347 | 0.468500584 |
| 0.216472084 | 0.487925136 |
| 0.297167146 | 0.548647921 |
| 0.297207529 | 0.548647921 |
| 0.107621581 | 0.43668842  |
| 0.187572796 | 0.468500584 |
| 0.326922597 | 0.551401334 |
| 0.333868696 | 0.551401334 |
| 0.189366143 | 0.468500584 |
| 0.319254104 | 0.551401334 |
| 0.194896243 | 0.468500584 |
| 0.127513146 | 0.43668842  |
| 0.204323923 | 0.472972045 |
| 0.162450167 | 0.468500584 |
| 0.179455639 | 0.468500584 |

|             |             |
|-------------|-------------|
| 0.289740133 | 0.548647921 |
| 0.114961514 | 0.43668842  |
| 0.200825938 | 0.472972045 |
| 0.273391631 | 0.548647921 |
| 0.281849871 | 0.548647921 |
| 0.188726283 | 0.468500584 |
| 0.35599032  | 0.551401334 |
| 0.180486562 | 0.468500584 |
| 0.344240669 | 0.551401334 |
| 0.363216538 | 0.551401334 |
| 0.34982322  | 0.551401334 |
| 0.391309163 | 0.562225809 |
| 0.285769791 | 0.548647921 |
| 0.340825975 | 0.551401334 |
| 0.33894926  | 0.551401334 |
| 0.341483408 | 0.551401334 |
| 0.348497169 | 0.551401334 |
| 0.386552376 | 0.561849383 |
| 0.423984623 | 0.576066063 |
| 0.090063853 | 0.43668842  |
| 0.320212273 | 0.551401334 |
| 0.419819954 | 0.576066063 |
| 0.383937873 | 0.561849383 |
| 0.366130486 | 0.551401334 |
| 0.376932082 | 0.560910836 |
| 0.419962035 | 0.576066063 |
| 0.362957471 | 0.551401334 |
| 0.434379475 | 0.576338819 |
| 0.438017502 | 0.576338819 |
| 0.410136897 | 0.576066063 |
| 0.432274994 | 0.576338819 |
| 0.327480388 | 0.551401334 |
| 0.413661683 | 0.576066063 |
| 0.466932923 | 0.607985577 |
| 0.473073113 | 0.6096303   |
| 0.489027966 | 0.623760161 |

|             |             |
|-------------|-------------|
| 0.491776621 | 0.998832479 |
| 0.457513718 | 0.998832479 |
| 0.343183871 | 0.998832479 |
| 0.386332986 | 0.998832479 |
| 0.452046401 | 0.998832479 |
| 0.398733789 | 0.998832479 |
| 0.403939335 | 0.998832479 |
| 0.430974124 | 0.998832479 |
| 0.120797898 | 0.998832479 |
| 0.308827318 | 0.998832479 |
| 0.145678415 | 0.998832479 |
| 0.117428659 | 0.998832479 |
| 0.137324826 | 0.998832479 |
| 0.262613627 | 0.998832479 |
| 0.269192054 | 0.998832479 |
| 0.191705727 | 0.998832479 |
| 0.074731117 | 0.998832479 |
| 0.230320003 | 0.998832479 |
| 0.121329148 | 0.998832479 |
| 0.176750012 | 0.998832479 |
| 0.149975815 | 0.998832479 |
| 0.050100204 | 0.998832479 |
| 0.056281336 | 0.998832479 |
| 0.223058809 | 0.998832479 |
| 0.185635769 | 0.998832479 |
| 0.220453375 | 0.998832479 |
| 0.183906432 | 0.998832479 |

| <b>P-value</b> | <b>FDR</b>  |
|----------------|-------------|
| 0.006019076    | 0.036114457 |
| 0.059279346    | 0.088919019 |
| 0.052227734    | 0.088919019 |
| 0.022268354    | 0.066805061 |
| 0.357302863    | 0.358320881 |
| 0.358320881    | 0.358320881 |

| P-value     | FDR         |
|-------------|-------------|
| 0.022081711 | 0.264980529 |
| 0.090805551 | 0.4934874   |
| 0.233242628 | 0.4934874   |
| 0.337566929 | 0.4934874   |
| 0.231786352 | 0.4934874   |
| 0.215006362 | 0.4934874   |
| 0.37011555  | 0.4934874   |
| 0.339205381 | 0.4934874   |
| 0.436068076 | 0.523281691 |
| 0.314964244 | 0.4934874   |
| 0.489538867 | 0.946685578 |
| 0.372959545 | 0.946685578 |

**Supplementary Table S5.** Enrichment and depletion levels within genes on chr14**Germ Layers**

| Name     | Enrichment ratio | Observed | Expected    |
|----------|------------------|----------|-------------|
| endoderm | 1.080495356      | 81       | 74.96561605 |
| ectoderm | 1.039732482      | 98       | 94.25501433 |
| mesoderm | 1.027189621      | 100      | 97.3530086  |

**Organs**

| Name               | Enrichment ratio | Observed | Expected    |
|--------------------|------------------|----------|-------------|
| appendix           | 1.629318394      | 2        | 1.227507163 |
| aorta              | 1.466386555      | 15       | 10.22922636 |
| thyroid            | 1.430621029      | 12       | 8.387965616 |
| red blood cells    | 1.425653595      | 38       | 26.65444126 |
| salivary gland     | 1.406124093      | 9        | 6.400573066 |
| olfactory bulb     | 1.323258585      | 7        | 5.289971347 |
| inner ear          | 1.296048723      | 10       | 7.715759312 |
| chin               | 1.284234874      | 28       | 21.80286533 |
| thigh              | 1.283890667      | 40       | 31.15530086 |
| hypothalamus       | 1.26724764       | 8        | 6.312893983 |
| coagulation system | 1.257063101      | 32       | 25.45616046 |
| middle ear         | 1.240645113      | 19       | 15.31461318 |
| pharynx            | 1.240447841      | 24       | 19.347851   |
| femur              | 1.220743139      | 35       | 28.67106017 |
| adrenal gland      | 1.215311261      | 13       | 10.69684814 |
| scapula            | 1.214104997      | 33       | 27.18051576 |
| peripheral nerve   | 1.212869476      | 57       | 46.99598854 |
| heart valve        | 1.209645474      | 35       | 28.93409742 |
| lower limb         | 1.205343575      | 75       | 62.22292264 |
| forearm            | 1.201659962      | 38       | 31.62292264 |
| epiglottis         | 1.200550396      | 6        | 4.997707736 |
| urinary bladder    | 1.199635342      | 23       | 19.17249284 |
| neck               | 1.196984404      | 53       | 44.27793696 |
| pituitary gland    | 1.177713839      | 19       | 16.13295129 |
| shin               | 1.168340507      | 35       | 29.95702006 |
| outer ear          | 1.162171162      | 34       | 29.25558739 |

|                           |             |    |             |
|---------------------------|-------------|----|-------------|
| peripheral nervous system | 1.157203284 | 74 | 63.94727794 |
| arm                       | 1.149598655 | 38 | 33.05501433 |
| tongue                    | 1.145294938 | 16 | 13.97020057 |
| clavicle                  | 1.144098183 | 32 | 27.96962751 |
| upper limb                | 1.143937615 | 67 | 58.56962751 |
| radius                    | 1.13563841  | 31 | 27.2974212  |
| humerus                   | 1.134613431 | 32 | 28.2034384  |
| fibula                    | 1.134221644 | 30 | 26.44985673 |
| pelvis                    | 1.133327148 | 42 | 37.05902579 |
| maxilla                   | 1.126442346 | 48 | 42.61203438 |
| spinal column             | 1.125339721 | 42 | 37.32206304 |
| mandible                  | 1.124129323 | 48 | 42.69971347 |
| lung                      | 1.1228298   | 55 | 48.98338109 |
| sinuses                   | 1.121825779 | 4  | 3.565616046 |
| blood                     | 1.121825779 | 62 | 55.26704871 |
| tibia                     | 1.120601079 | 30 | 26.7713467  |
| jaw                       | 1.120295321 | 48 | 42.84584527 |
| sweat gland               | 1.118769033 | 12 | 10.7260745  |
| diaphragm                 | 1.11683249  | 11 | 9.849283668 |
| skull                     | 1.116475707 | 65 | 58.21891117 |
| vertebrae                 | 1.104645501 | 39 | 35.30544413 |
| cerebellum                | 1.104600895 | 41 | 37.11747851 |
| elbow                     | 1.103731815 | 39 | 35.33467049 |
| nose                      | 1.099185968 | 39 | 35.48080229 |
| trachea                   | 1.094106247 | 11 | 10.05386819 |
| wrist                     | 1.093780135 | 39 | 35.65616046 |
| sternum                   | 1.086768724 | 31 | 28.52492837 |
| ulna                      | 1.086212263 | 30 | 27.61891117 |
| mouth                     | 1.084800864 | 61 | 56.23151862 |
| head                      | 1.08130837  | 98 | 90.63094556 |
| shoulder                  | 1.07850863  | 40 | 37.08825215 |
| esophagus                 | 1.078312537 | 26 | 24.11174785 |
| brain                     | 1.07558916  | 90 | 83.67507163 |
| cranial nerve             | 1.073109582 | 52 | 48.45730659 |
| ankle                     | 1.072678267 | 39 | 36.35759312 |
| hip                       | 1.070097646 | 39 | 36.44527221 |

|                     |             |    |             |
|---------------------|-------------|----|-------------|
| hand                | 1.068664407 | 58 | 54.27335244 |
| foot                | 1.068145784 | 61 | 57.10830946 |
| placenta            | 1.061866126 | 9  | 8.475644699 |
| ear                 | 1.057891546 | 67 | 63.33352436 |
| lacrimial apparatus | 1.052790347 | 4  | 3.799426934 |
| teeth               | 1.050850316 | 25 | 23.79025788 |
| spinal cord         | 1.048756667 | 40 | 38.14040115 |
| lymph vessels       | 1.047418968 | 3  | 2.864183381 |
| knee                | 1.046856746 | 38 | 36.2991404  |
| blood vessels       | 1.044318948 | 55 | 52.66590258 |
| heart               | 1.044001942 | 53 | 50.76618911 |
| abdominal wall      | 1.043161167 | 20 | 19.17249284 |
| chest wall          | 1.035046689 | 35 | 33.81489971 |
| forehead            | 1.03451683  | 27 | 26.0991404  |
| face                | 1.025900643 | 54 | 52.63667622 |
| breast              | 1.023272861 | 16 | 15.63610315 |
| cheek               | 1.021363769 | 16 | 15.66532951 |
| skin                | 1.013254229 | 69 | 68.0974212  |
| cerebrospinal fluid | 1.009041686 | 11 | 10.90143266 |
| rib                 | 1.004655218 | 35 | 34.83782235 |
| rib cage            | 1.004655218 | 35 | 34.83782235 |
| fingers             | 1.004605642 | 51 | 50.76618911 |
| digit               | 1.00012124  | 52 | 51.99369628 |
| toes                | 0.999289903 | 50 | 50.03553009 |
| prostate            | 0.996573387 | 12 | 12.04126074 |
| kidney              | 0.991759022 | 40 | 40.33237822 |
| liver               | 0.984624065 | 32 | 32.49971347 |
| eyelid              | 0.968637247 | 34 | 35.1008596  |
| spleen              | 0.965522011 | 16 | 16.5713467  |
| stomach             | 0.962853483 | 28 | 29.08022923 |
| intestine           | 0.955411833 | 32 | 33.49340974 |
| testis              | 0.95436315  | 27 | 28.29111748 |
| larynx              | 0.954222326 | 14 | 14.67163324 |
| ovary               | 0.953747353 | 16 | 16.77593123 |
| urethra             | 0.948409214 | 13 | 13.70716332 |
| meninges            | 0.946928587 | 15 | 15.84068768 |

|                   |             |    |             |
|-------------------|-------------|----|-------------|
| white blood cells | 0.940324711 | 31 | 32.96733524 |
| lips              | 0.935877633 | 25 | 26.71289398 |
| eye               | 0.92595921  | 62 | 66.95759312 |
| penis             | 0.924748278 | 20 | 21.62750716 |
| bone marrow       | 0.922670192 | 12 | 13.00573066 |
| large intestine   | 0.903155171 | 26 | 28.78796562 |
| uterus            | 0.885582468 | 22 | 24.84240688 |
| hair              | 0.883800014 | 28 | 31.68137536 |
| nail              | 0.87893506  | 14 | 15.92836676 |
| lymph nodes       | 0.869890329 | 6  | 6.897421203 |
| vulva             | 0.867217855 | 11 | 12.68424069 |
| bronchus          | 0.85302265  | 9  | 10.55071633 |
| small intestine   | 0.848641599 | 22 | 25.92378223 |
| anus              | 0.831150274 | 6  | 7.218911175 |
| ureter            | 0.806973733 | 15 | 18.58796562 |
| vocal cords       | 0.793407218 | 8  | 10.08309456 |
| biliary tract     | 0.760348584 | 9  | 11.83667622 |
| vagina            | 0.731886337 | 12 | 16.39598854 |
| rectum            | 0.718816939 | 10 | 13.91174785 |
| pancreas          | 0.668275123 | 15 | 22.44584527 |
| gallbladder       | 0.65484567  | 4  | 6.108309456 |
| duodenum          | 0.596092095 | 5  | 8.387965616 |
| parathyroid       | 0.518419489 | 1  | 1.928939828 |
| scalp             | 0.45620915  | 3  | 6.575931232 |
| vas deferens      | 0.427696078 | 2  | 4.676217765 |
| thymus            | 0.375996552 | 1  | 2.659598854 |
| fallopian tube    | 0.242664442 | 1  | 4.120916905 |

## Body Regions

| Name          | Enrichment ratio | Observed | Expected    |
|---------------|------------------|----------|-------------|
| limbs         | 1.19105237       | 77       | 64.6487106  |
| abdomen       | 1.075083039      | 69       | 64.18108883 |
| pelvis        | 1.063962604      | 63       | 59.21260745 |
| thorax        | 1.062097924      | 79       | 74.38108883 |
| head and neck | 1.059872635      | 99       | 93.40744986 |
| non-specific  | 1.028803958      | 97       | 94.28424069 |



## Body Systems

| Name            | Enrichment ratio | Observed | Expected    |
|-----------------|------------------|----------|-------------|
| respiratory     | 1.144696248      | 64       | 55.91002865 |
| skeleton        | 1.1157289        | 78       | 69.90945559 |
| skeletal muscle | 1.099353665      | 81       | 73.67965616 |
| cardiovascular  | 1.098739813      | 71       | 64.61948424 |
| endocrine       | 1.094386955      | 34       | 31.06762178 |
| nervous         | 1.06463903       | 94       | 88.29283668 |
| immune          | 1.049308479      | 51       | 48.6034384  |
| reproductive    | 1.047661932      | 44       | 41.9982808  |
| digestive       | 1.046402056      | 63       | 60.20630372 |
| integumentary   | 1.016874728      | 71       | 69.8217765  |
| urinary         | 0.988257948      | 45       | 45.53467049 |
| lymphatic       | 0.923613617      | 22       | 23.81948424 |

| P-value     | FDR         |
|-------------|-------------|
| 0.089683275 | 0.128511984 |
| 0.091368674 | 0.128511984 |
| 0.128511984 | 0.128511984 |

| P-value     | FDR         |
|-------------|-------------|
| 0.305641582 | 0.647545726 |
| 0.073318245 | 0.599650746 |
| 0.114719345 | 0.599650746 |
| 0.007403998 | 0.392355364 |
| 0.164370497 | 0.599650746 |
| 0.237032854 | 0.599650746 |
| 0.20796873  | 0.599650746 |
| 0.074664865 | 0.599650746 |
| 0.032610212 | 0.599650746 |
| 0.252888749 | 0.607905646 |
| 0.07340835  | 0.599650746 |
| 0.161229332 | 0.599650746 |
| 0.127378401 | 0.599650746 |
| 0.087005783 | 0.599650746 |
| 0.233513492 | 0.599650746 |
| 0.101764465 | 0.599650746 |
| 0.025014828 | 0.599650746 |
| 0.096559404 | 0.599650746 |
| 0.004599142 | 0.392355364 |
| 0.090783214 | 0.599650746 |
| 0.322692269 | 0.655158278 |
| 0.171435234 | 0.599650746 |
| 0.043110289 | 0.599650746 |
| 0.221674367 | 0.599650746 |
| 0.140578257 | 0.599650746 |
| 0.153348406 | 0.599650746 |

|             |             |
|-------------|-------------|
| 0.019791542 | 0.599650746 |
| 0.151176016 | 0.599650746 |
| 0.279075277 | 0.643121909 |
| 0.188405229 | 0.599650746 |
| 0.046743312 | 0.599650746 |
| 0.206102282 | 0.599650746 |
| 0.202669883 | 0.599650746 |
| 0.21332849  | 0.599650746 |
| 0.157458293 | 0.599650746 |
| 0.142472744 | 0.599650746 |
| 0.170779319 | 0.599650746 |
| 0.146446064 | 0.599650746 |
| 0.119087873 | 0.599650746 |
| 0.393591588 | 0.689029879 |
| 0.092485098 | 0.599650746 |
| 0.234914667 | 0.599650746 |
| 0.153228788 | 0.599650746 |
| 0.33551242  | 0.655297695 |
| 0.344022279 | 0.661581306 |
| 0.089315722 | 0.599650746 |
| 0.222460483 | 0.599650746 |
| 0.213857109 | 0.599650746 |
| 0.224267619 | 0.599650746 |
| 0.233420584 | 0.599650746 |
| 0.368464656 | 0.677324736 |
| 0.244657505 | 0.599650746 |
| 0.291556751 | 0.643121909 |
| 0.296621537 | 0.643121909 |
| 0.173766417 | 0.599650746 |
| 0.009416529 | 0.392355364 |
| 0.274729757 | 0.643121909 |
| 0.327084925 | 0.655158278 |
| 0.052197713 | 0.599650746 |
| 0.242955072 | 0.599650746 |
| 0.292195877 | 0.643121909 |
| 0.298408566 | 0.643121909 |

|             |             |
|-------------|-------------|
| 0.232137883 | 0.599650746 |
| 0.221428785 | 0.599650746 |
| 0.412144223 | 0.689029879 |
| 0.230506573 | 0.599650746 |
| 0.435014407 | 0.704784383 |
| 0.383299875 | 0.689029879 |
| 0.350421783 | 0.663677619 |
| 0.439785455 | 0.704784383 |
| 0.360615179 | 0.672789514 |
| 0.323349027 | 0.655158278 |
| 0.330199772 | 0.655158278 |
| 0.409313677 | 0.689029879 |
| 0.398311983 | 0.689029879 |
| 0.413417927 | 0.689029879 |
| 0.394278334 | 0.689029879 |
| 0.449159157 | 0.706643757 |
| 0.452252004 | 0.706643757 |
| 0.428802202 | 0.704784383 |
| 0.471656222 | 0.71708577  |
| 0.481881637 | 0.71708577  |
| 0.481881637 | 0.71708577  |
| 0.480890609 | 0.71708577  |
| 0.49894295  | 0.720923652 |
| 0.497402552 | 0.996271293 |
| 0.489459677 | 0.719793643 |
| 0.475575839 | 0.996271293 |
| 0.462130477 | 0.996271293 |
| 0.41227467  | 0.996271293 |
| 0.449728404 | 0.996271293 |
| 0.411076471 | 0.996271293 |
| 0.379323114 | 0.996271293 |
| 0.392220005 | 0.996271293 |
| 0.436496951 | 0.996271293 |
| 0.428054598 | 0.996271293 |
| 0.430891974 | 0.996271293 |
| 0.419637112 | 0.996271293 |

|             |             |
|-------------|-------------|
| 0.340800007 | 0.996271293 |
| 0.354078509 | 0.996271293 |
| 0.148559491 | 0.996271293 |
| 0.352601917 | 0.996271293 |
| 0.394434157 | 0.996271293 |
| 0.271262206 | 0.996271293 |
| 0.25778725  | 0.996271293 |
| 0.214785564 | 0.996271293 |
| 0.306018174 | 0.996271293 |
| 0.379997689 | 0.996271293 |
| 0.315477431 | 0.996271293 |
| 0.317608334 | 0.996271293 |
| 0.185007191 | 0.996271293 |
| 0.334293279 | 0.996271293 |
| 0.177978941 | 0.996271293 |
| 0.25146516  | 0.996271293 |
| 0.191669273 | 0.996271293 |
| 0.113764553 | 0.996271293 |
| 0.125952054 | 0.996271293 |
| 0.03217527  | 0.996271293 |
| 0.194225411 | 0.996271293 |
| 0.105579702 | 0.996271293 |
| 0.278918671 | 0.996271293 |
| 0.065031565 | 0.996271293 |
| 0.095693178 | 0.996271293 |
| 0.156183319 | 0.996271293 |
| 0.044942884 | 0.996271293 |

| <b>P-value</b> | <b>FDR</b>  |
|----------------|-------------|
| 0.005317803    | 0.031906815 |
| 0.164503246    | 0.205032111 |
| 0.226492853    | 0.226492853 |
| 0.15547421     | 0.205032111 |
| 0.02488485     | 0.07465455  |
| 0.170860092    | 0.205032111 |

| P-value     | FDR         |
|-------------|-------------|
| 0.055191827 | 0.165575481 |
| 0.042466822 | 0.165575481 |
| 0.053218698 | 0.165575481 |
| 0.096692144 | 0.232061145 |
| 0.264208478 | 0.45736816  |
| 0.050422213 | 0.165575481 |
| 0.318232351 | 0.45736816  |
| 0.34302612  | 0.45736816  |
| 0.289838238 | 0.45736816  |
| 0.40557563  | 0.486690756 |
| 0.458533537 | 0.961718203 |
| 0.339875849 | 0.961718203 |

**Supplementary Table S5.** Enrichment and depletion levels within genes on chr16**Germ Layers**

| Name     | Enrichment ratio | Observed | Expected    |
|----------|------------------|----------|-------------|
| ectoderm | 1.023674838      | 140      | 136.7621777 |
| mesoderm | 1.005257734      | 142      | 141.2573066 |
| endoderm | 0.919340393      | 100      | 108.773639  |

**Organs**

| Name                 | Enrichment ratio | Observed | Expected    |
|----------------------|------------------|----------|-------------|
| appendix             | 3.368725869      | 6        | 1.781088825 |
| anus                 | 1.527519422      | 16       | 10.47449857 |
| gallbladder          | 1.466765809      | 13       | 8.863037249 |
| urethra              | 1.458105227      | 29       | 19.88882521 |
| lacrimonal apparatus | 1.451143451      | 8        | 5.512893983 |
| trachea              | 1.43954274       | 21       | 14.58796562 |
| spleen               | 1.414033081      | 34       | 24.04469914 |
| biliary tract        | 1.397397397      | 24       | 17.1747851  |
| scalp                | 1.362462462      | 13       | 9.541547278 |
| sinuses              | 1.353012849      | 7        | 5.173638968 |
| rectum               | 1.288042244      | 26       | 20.18567335 |
| cerebrospinal fluid  | 1.26440113       | 20       | 15.81776504 |
| meninges             | 1.26171836       | 29       | 22.98452722 |
| urinary bladder      | 1.258136948      | 35       | 27.81891117 |
| lymph nodes          | 1.199038021      | 12       | 10.00802292 |
| breast               | 1.190073251      | 27       | 22.68767908 |
| diaphragm            | 1.189550084      | 17       | 14.29111748 |
| salivary gland       | 1.184437863      | 11       | 9.287106017 |
| vas deferens         | 1.179054054      | 8        | 6.785100287 |
| bronchus             | 1.175787976      | 18       | 15.30888252 |
| nail                 | 1.168237044      | 27       | 23.11174785 |
| pancreas             | 1.166772241      | 38       | 32.56848138 |
| abdominal wall       | 1.150296638      | 32       | 27.81891117 |
| heart valve          | 1.143325143      | 48       | 41.98280802 |
| placenta             | 1.138397018      | 14       | 12.29799427 |
| larynx               | 1.127382362      | 24       | 21.28825215 |

|                           |             |     |             |
|---------------------------|-------------|-----|-------------|
| bone marrow               | 1.112815062 | 21  | 18.87106017 |
| ureter                    | 1.112315145 | 30  | 26.97077364 |
| testis                    | 1.096227943 | 45  | 41.04985673 |
| cerebellum                | 1.095499042 | 59  | 53.85673352 |
| adrenal gland             | 1.095296116 | 17  | 15.52091691 |
| esophagus                 | 1.086158886 | 38  | 34.98567335 |
| intestine                 | 1.069996698 | 52  | 48.5982808  |
| pharynx                   | 1.068629052 | 30  | 28.07335244 |
| duodenum                  | 1.068132593 | 13  | 12.17077364 |
| penis                     | 1.051588751 | 33  | 31.38108883 |
| white blood cells         | 1.045260686 | 50  | 47.83495702 |
| olfactory bulb            | 1.042257727 | 8   | 7.675644699 |
| forehead                  | 1.029856845 | 39  | 37.86934097 |
| large intestine           | 1.029427905 | 43  | 41.77077364 |
| small intestine           | 1.010237972 | 38  | 37.61489971 |
| vagina                    | 1.008816303 | 24  | 23.79025788 |
| eye                       | 1.008706218 | 98  | 97.15415473 |
| kidney                    | 1.008176655 | 59  | 58.52148997 |
| head                      | 1.003773848 | 132 | 131.5037249 |
| hair                      | 1.000673182 | 46  | 45.96905444 |
| liver                     | 0.996682384 | 47  | 47.15644699 |
| brain                     | 0.996615722 | 121 | 121.4108883 |
| mouth                     | 0.992758611 | 81  | 81.59083095 |
| peripheral nervous system | 0.991526261 | 92  | 92.78624642 |
| shin                      | 0.989255109 | 43  | 43.46704871 |
| face                      | 0.98199949  | 75  | 76.3747851  |
| skin                      | 0.981701659 | 97  | 98.80802292 |
| cranial nerve             | 0.981359828 | 69  | 70.31060172 |
| forearm                   | 0.98072888  | 45  | 45.88424069 |
| arm                       | 0.979938825 | 47  | 47.96217765 |
| spinal cord               | 0.975768872 | 54  | 55.34097421 |
| stomach                   | 0.971682738 | 41  | 42.19484241 |
| fibula                    | 0.964088398 | 37  | 38.3782235  |
| lymph vessels             | 0.962493105 | 4   | 4.155873926 |
| clavicle                  | 0.960984495 | 39  | 40.58338109 |
| spinal column             | 0.960231963 | 52  | 54.15358166 |



|                  |             |    |             |
|------------------|-------------|----|-------------|
| radius           | 0.959401586 | 38 | 39.60802292 |
| skull            | 0.958869261 | 81 | 84.47449857 |
| peripheral nerve | 0.953215342 | 65 | 68.19025788 |
| tibia            | 0.952510917 | 37 | 38.84469914 |
| thigh            | 0.951206835 | 43 | 45.20573066 |
| ulna             | 0.948233948 | 38 | 40.07449857 |
| middle ear       | 0.945043326 | 21 | 22.22120344 |
| ovary            | 0.944886524 | 23 | 24.34154728 |
| aorta            | 0.943243243 | 14 | 14.84240688 |
| upper limb       | 0.941360522 | 80 | 84.98338109 |
| foot             | 0.941312346 | 78 | 82.86303725 |
| digit            | 0.941122404 | 71 | 75.44183381 |
| femur            | 0.937474171 | 39 | 41.60114613 |
| fingers          | 0.936726882 | 69 | 73.66074499 |
| heart            | 0.936726882 | 69 | 73.66074499 |
| blood            | 0.935262338 | 75 | 80.19140401 |
| lower limb       | 0.930394932 | 84 | 90.28424069 |
| lung             | 0.928610591 | 66 | 71.0739255  |
| hand             | 0.926989186 | 73 | 78.7495702  |
| vulva            | 0.923682899 | 17 | 18.40458453 |
| toes             | 0.922857729 | 67 | 72.60057307 |
| chest wall       | 0.917155271 | 45 | 49.06475645 |
| nose             | 0.91294136  | 47 | 51.48194842 |
| rib              | 0.910008163 | 46 | 50.54899713 |
| rib cage         | 0.910008163 | 46 | 50.54899713 |
| humerus          | 0.904145078 | 37 | 40.9226361  |
| ear              | 0.903197845 | 83 | 91.89570201 |
| sweat gland      | 0.899550777 | 14 | 15.56332378 |
| vertebrae        | 0.897955074 | 46 | 51.22750716 |
| sternum          | 0.893954918 | 37 | 41.38911175 |
| ankle            | 0.890925089 | 47 | 52.75415473 |
| blood vessels    | 0.889852116 | 68 | 76.41719198 |
| maxilla          | 0.889546954 | 55 | 61.82922636 |
| tongue           | 0.887990501 | 18 | 20.27048711 |
| mandible         | 0.887720369 | 55 | 61.95644699 |
| scapula          | 0.887460041 | 35 | 39.43839542 |

|                    |             |    |             |
|--------------------|-------------|----|-------------|
| neck               | 0.887208991 | 57 | 64.24641834 |
| jaw                | 0.884692674 | 55 | 62.16848138 |
| eyelid             | 0.883554245 | 45 | 50.93065903 |
| lips               | 0.877195576 | 34 | 38.75988539 |
| pelvis             | 0.874062154 | 47 | 53.77191977 |
| teeth              | 0.869081612 | 30 | 34.51919771 |
| coagulation system | 0.866354299 | 32 | 36.93638968 |
| uterus             | 0.860015898 | 31 | 36.04584527 |
| shoulder           | 0.854790961 | 46 | 53.81432665 |
| chin               | 0.853470763 | 27 | 31.63553009 |
| red blood cells    | 0.853262802 | 33 | 38.67507163 |
| outer ear          | 0.848070848 | 36 | 42.44928367 |
| cheek              | 0.835896531 | 19 | 22.73008596 |
| hip                | 0.832050976 | 44 | 52.88137536 |
| epiglottis         | 0.827406354 | 6  | 7.251575931 |
| knee               | 0.81641424  | 43 | 52.66934097 |
| wrist              | 0.811807709 | 42 | 51.73638968 |
| pituitary gland    | 0.811667646 | 19 | 23.40859599 |
| elbow              | 0.799689267 | 41 | 51.26991404 |
| vocal cords        | 0.751860556 | 11 | 14.63037249 |
| prostate           | 0.744063238 | 13 | 17.47163324 |
| fallopian tube     | 0.668966839 | 4  | 5.979369628 |
| inner ear          | 0.625255938 | 7  | 11.19541547 |
| thymus             | 0.518265518 | 2  | 3.859025788 |
| thyroid            | 0.492984273 | 6  | 12.17077364 |
| hypothalamus       | 0.436686687 | 4  | 9.159885387 |
| parathyroid        | 0.357289107 | 1  | 2.798853868 |

## Body Regions

| Name          | Enrichment ratio | Observed | Expected    |
|---------------|------------------|----------|-------------|
| head and neck | 1.003450259      | 136      | 135.5323782 |
| abdomen       | 0.998652341      | 93       | 93.12550143 |
| pelvis        | 0.977695366      | 84       | 85.91633238 |
| non-specific  | 0.964879945      | 132      | 136.8045845 |
| limbs         | 0.927465666      | 87       | 93.80401146 |
| thorax        | 0.917299421      | 99       | 107.9255014 |

## Body Systems

| Name            | Enrichment ratio | Observed | Expected    |
|-----------------|------------------|----------|-------------|
| lymphatic       | 1.388824407      | 48       | 34.56160458 |
| immune          | 1.049308479      | 74       | 70.5226361  |
| urinary         | 1.044348264      | 69       | 66.06991404 |
| skeletal muscle | 1.019570741      | 109      | 106.9077364 |
| nervous         | 1.014743641      | 130      | 128.1111748 |
| integumentary   | 0.996939803      | 101      | 101.3100287 |
| skeleton        | 0.985831149      | 100      | 101.4372493 |
| digestive       | 0.9844529        | 86       | 87.35816619 |
| reproductive    | 0.918956535      | 56       | 60.93868195 |
| endocrine       | 0.909524294      | 41       | 45.07851003 |
| cardiovascular  | 0.906554451      | 85       | 93.76160458 |
| respiratory     | 0.887526314      | 72       | 81.1243553  |

| <b>P-value</b> | <b>FDR</b>  |
|----------------|-------------|
| 0.166442185    | 0.499326556 |
| 0.401694117    | 0.602541175 |
| 0.050335676    | 0.151007029 |

| <b>P-value</b> | <b>FDR</b>  |
|----------------|-------------|
| 0.013153286    | 0.782512568 |
| 0.051083062    | 0.963747627 |
| 0.09213345     | 0.963747627 |
| 0.018780302    | 0.782512568 |
| 0.162186344    | 0.963747627 |
| 0.047776155    | 0.963747627 |
| 0.016959885    | 0.782512568 |
| 0.047767349    | 0.963747627 |
| 0.136623966    | 0.963747627 |
| 0.222464667    | 0.963747627 |
| 0.088300968    | 0.963747627 |
| 0.139491369    | 0.963747627 |
| 0.091369763    | 0.963747627 |
| 0.069713125    | 0.963747627 |
| 0.258337575    | 0.963747627 |
| 0.164958242    | 0.963747627 |
| 0.226873601    | 0.963747627 |
| 0.280170221    | 0.963747627 |
| 0.313918451    | 0.963747627 |
| 0.234253513    | 0.963747627 |
| 0.190319997    | 0.963747627 |
| 0.141967334    | 0.963747627 |
| 0.189762297    | 0.963747627 |
| 0.13671841     | 0.963747627 |
| 0.302167934    | 0.963747627 |
| 0.260319515    | 0.963747627 |

|             |             |
|-------------|-------------|
| 0.295795742 | 0.963747627 |
| 0.256974821 | 0.963747627 |
| 0.232265867 | 0.963747627 |
| 0.188637981 | 0.963747627 |
| 0.339034556 | 0.963747627 |
| 0.276771675 | 0.963747627 |
| 0.273296915 | 0.963747627 |
| 0.337779241 | 0.963747627 |
| 0.391284498 | 0.963747627 |
| 0.366673634 | 0.963747627 |
| 0.348285466 | 0.963747627 |
| 0.435114511 | 0.963747627 |
| 0.410205748 | 0.963747627 |
| 0.406360261 | 0.963747627 |
| 0.465033729 | 0.963747627 |
| 0.47178631  | 0.963747627 |
| 0.44425175  | 0.963747627 |
| 0.465305005 | 0.963747627 |
| 0.458624706 | 0.963747627 |
| 0.493273146 | 0.963747627 |
| 0.492743497 | 0.785877312 |
| 0.456113022 | 0.755571531 |
| 0.459387491 | 0.755571531 |
| 0.443332776 | 0.748872933 |
| 0.470386742 | 0.76361484  |
| 0.408684269 | 0.739831023 |
| 0.371050354 | 0.739831023 |
| 0.413573683 | 0.739831023 |
| 0.440513039 | 0.748872933 |
| 0.435407189 | 0.748872933 |
| 0.410779776 | 0.739831023 |
| 0.416943747 | 0.739831023 |
| 0.401370803 | 0.739831023 |
| 0.496674461 | 0.785877312 |
| 0.387854278 | 0.739831023 |
| 0.356486053 | 0.739831023 |

|             |             |
|-------------|-------------|
| 0.38535619  | 0.739831023 |
| 0.277688081 | 0.694220202 |
| 0.296638634 | 0.715080016 |
| 0.367547857 | 0.739831023 |
| 0.34775907  | 0.739831023 |
| 0.352313206 | 0.739831023 |
| 0.396596092 | 0.739831023 |
| 0.389370156 | 0.739831023 |
| 0.420224021 | 0.739831023 |
| 0.199185813 | 0.591518214 |
| 0.205864237 | 0.591518214 |
| 0.228500108 | 0.60309107  |
| 0.317667836 | 0.739831023 |
| 0.217678703 | 0.591518214 |
| 0.217678703 | 0.591518214 |
| 0.191457924 | 0.591518214 |
| 0.140624828 | 0.591518214 |
| 0.19775144  | 0.591518214 |
| 0.167374789 | 0.591518214 |
| 0.371009486 | 0.739831023 |
| 0.174215475 | 0.591518214 |
| 0.236411699 | 0.60309107  |
| 0.216472292 | 0.591518214 |
| 0.212010975 | 0.591518214 |
| 0.212010975 | 0.591518214 |
| 0.233479466 | 0.60309107  |
| 0.063355852 | 0.591518214 |
| 0.34565685  | 0.739831023 |
| 0.179273084 | 0.591518214 |
| 0.207924339 | 0.591518214 |
| 0.157331735 | 0.591518214 |
| 0.079305132 | 0.591518214 |
| 0.122891251 | 0.591518214 |
| 0.297473287 | 0.715080016 |
| 0.118575885 | 0.591518214 |
| 0.201722605 | 0.591518214 |

|             |             |
|-------------|-------------|
| 0.11014559  | 0.591518214 |
| 0.111626855 | 0.591518214 |
| 0.147907405 | 0.591518214 |
| 0.183301121 | 0.591518214 |
| 0.118715857 | 0.591518214 |
| 0.186700921 | 0.591518214 |
| 0.170413784 | 0.591518214 |
| 0.162917649 | 0.591518214 |
| 0.085911721 | 0.591518214 |
| 0.172776577 | 0.591518214 |
| 0.139433883 | 0.591518214 |
| 0.115372888 | 0.591518214 |
| 0.195653076 | 0.591518214 |
| 0.059007473 | 0.591518214 |
| 0.330940869 | 0.739831023 |
| 0.043953271 | 0.591518214 |
| 0.04212752  | 0.591518214 |
| 0.156377738 | 0.591518214 |
| 0.033793501 | 0.591518214 |
| 0.155200997 | 0.591518214 |
| 0.121595107 | 0.591518214 |
| 0.209226513 | 0.591518214 |
| 0.087785483 | 0.591518214 |
| 0.171955865 | 0.591518214 |
| 0.02322493  | 0.591518214 |
| 0.028288212 | 0.591518214 |
| 0.13875228  | 0.591518214 |

| P-value     | FDR         |
|-------------|-------------|
| 0.4568692   | 0.948949186 |
| 0.488619942 | 0.54094728  |
| 0.371235712 | 0.54094728  |
| 0.07111976  | 0.21335928  |
| 0.119110193 | 0.238220386 |
| 0.04855398  | 0.21335928  |

| P-value     | FDR         |
|-------------|-------------|
| 0.005783951 | 0.069407415 |
| 0.282296932 | 0.849130069 |
| 0.312375137 | 0.849130069 |
| 0.353804195 | 0.849130069 |
| 0.333022084 | 0.849130069 |
| 0.473754606 | 0.785650658 |
| 0.394254631 | 0.785650658 |
| 0.406933137 | 0.785650658 |
| 0.200901048 | 0.692334057 |
| 0.230778019 | 0.692334057 |
| 0.06504719  | 0.39028314  |
| 0.062718061 | 0.39028314  |



**Supplementary Table S5.** Enrichment and depletion levels within genes on chr17**Germ Layers**

| Name     | Enrichment ratio | Observed | Expected    |
|----------|------------------|----------|-------------|
| endoderm | 1.056728115      | 153      | 144.786533  |
| ectoderm | 1.010758273      | 184      | 182.0415473 |
| mesoderm | 0.994548976      | 187      | 188.0249284 |

**Organs**

| Name                | Enrichment ratio | Observed | Expected    |
|---------------------|------------------|----------|-------------|
| sinuses             | 1.597320463      | 11       | 6.886532951 |
| trachea             | 1.441978515      | 28       | 19.41776504 |
| teeth               | 1.349355816      | 62       | 45.947851   |
| epiglottis          | 1.346810342      | 13       | 9.65243553  |
| scalp               | 1.338522279      | 17       | 12.70057307 |
| nail                | 1.332743445      | 41       | 30.76361032 |
| vas deferens        | 1.328680203      | 12       | 9.031518625 |
| pharynx             | 1.311285598      | 49       | 37.36790831 |
| forehead            | 1.309337714      | 66       | 50.40716332 |
| sweat gland         | 1.303337529      | 27       | 20.71604585 |
| cheek               | 1.289018107      | 39       | 30.25558739 |
| bronchus            | 1.275925587      | 26       | 20.3773639  |
| appendix            | 1.265409717      | 3        | 2.370773639 |
| lips                | 1.259871819      | 65       | 51.59255014 |
| fallopian tube      | 1.25643518       | 10       | 7.959025788 |
| maxilla             | 1.251523191      | 103      | 82.29971347 |
| mandible            | 1.248953328      | 103      | 82.46905444 |
| jaw                 | 1.244693596      | 103      | 82.7512894  |
| larynx              | 1.235160879      | 35       | 28.33638968 |
| chin                | 1.234877043      | 52       | 42.10945559 |
| cerebrospinal fluid | 1.234877043      | 26       | 21.05472779 |
| vocal cords         | 1.232399029      | 24       | 19.47421203 |
| hypothalamus        | 1.230259447      | 15       | 12.19255014 |
| digit               | 1.224865392      | 123      | 100.4191977 |
| middle ear          | 1.217111636      | 36       | 29.5782235  |
| mouth               | 1.206216955      | 131      | 108.6040115 |

|            |             |     |             |
|------------|-------------|-----|-------------|
| toes       | 1.200365292 | 116 | 96.63724928 |
| fingers    | 1.19328792  | 117 | 98.04842407 |
| tongue     | 1.185990697 | 32  | 26.98166189 |
| outer ear  | 1.185768546 | 67  | 56.5034384  |
| hand       | 1.182957065 | 124 | 104.822063  |
| nose       | 1.182021927 | 81  | 68.52664756 |
| face       | 1.180393295 | 120 | 101.6610315 |
| hip        | 1.179154845 | 83  | 70.38939828 |
| hair       | 1.176690955 | 72  | 61.18853868 |
| skull      | 1.173934316 | 132 | 112.4424069 |
| femur      | 1.173825528 | 65  | 55.37449857 |
| ureter     | 1.169907097 | 42  | 35.90028653 |
| uterus     | 1.167154374 | 56  | 47.97994269 |
| upper limb | 1.166904769 | 132 | 113.1197708 |
| thigh      | 1.163322254 | 70  | 60.17249284 |
| placenta   | 1.160686154 | 19  | 16.36962751 |
| rib        | 1.159251184 | 78  | 67.28481375 |
| rib cage   | 1.159251184 | 78  | 67.28481375 |
| shoulder   | 1.158712444 | 83  | 71.63123209 |
| elbow      | 1.157603927 | 79  | 68.24441261 |
| fibula     | 1.154948537 | 59  | 51.08452722 |
| rectum     | 1.153755919 | 31  | 26.86876791 |
| ankle      | 1.153516575 | 81  | 70.22005731 |
| lung       | 1.152157058 | 109 | 94.60515759 |
| anus       | 1.147578043 | 16  | 13.94240688 |
| forearm    | 1.146119707 | 70  | 61.0756447  |
| neck       | 1.145968404 | 98  | 85.51719198 |
| pelvis     | 1.145654854 | 82  | 71.5747851  |
| arm        | 1.143455996 | 73  | 63.84154728 |
| foot       | 1.142365784 | 126 | 110.2974212 |
| knee       | 1.141110212 | 80  | 70.10716332 |
| tibia      | 1.141079068 | 59  | 51.70544413 |
| wrist      | 1.132645419 | 78  | 68.86532951 |
| skin       | 1.125291388 | 148 | 131.52149   |
| shin       | 1.12343692  | 65  | 57.85816619 |
| humerus    | 1.119854817 | 61  | 54.4713467  |

|                   |             |     |             |
|-------------------|-------------|-----|-------------|
| radius            | 1.119088251 | 59  | 52.72148997 |
| vertebrae         | 1.114566175 | 76  | 68.18796562 |
| meninges          | 1.111319235 | 34  | 30.59426934 |
| spinal column     | 1.109834678 | 80  | 72.08280802 |
| ulna              | 1.106061827 | 59  | 53.34240688 |
| scapula           | 1.104852355 | 58  | 52.49570201 |
| clavicle          | 1.092192713 | 59  | 54.01977077 |
| lower limb        | 1.090071123 | 131 | 120.1756447 |
| sternum           | 1.089082134 | 60  | 55.09226361 |
| red blood cells   | 1.087808353 | 56  | 51.47965616 |
| ovary             | 1.080227807 | 35  | 32.40057307 |
| parathyroid       | 1.073680972 | 4   | 3.725501433 |
| adrenal gland     | 1.064880308 | 22  | 20.65959885 |
| testis            | 1.061480052 | 58  | 54.64068768 |
| chest wall        | 1.056513212 | 69  | 65.30916905 |
| penis             | 1.053368089 | 44  | 41.77077364 |
| urinary bladder   | 1.053222112 | 39  | 37.02922636 |
| blood vessels     | 1.051933272 | 107 | 101.7174785 |
| stomach           | 1.050480831 | 59  | 56.16475645 |
| biliary tract     | 1.049821395 | 24  | 22.86103152 |
| duodenum          | 1.049364156 | 17  | 16.20028653 |
| thyroid           | 1.049364156 | 17  | 16.20028653 |
| eyelid            | 1.047308292 | 71  | 67.79283668 |
| large intestine   | 1.043160092 | 58  | 55.60028653 |
| vagina            | 1.04210212  | 33  | 31.66676218 |
| blood             | 1.039897779 | 111 | 106.7412607 |
| prostate          | 1.031984624 | 24  | 23.25616046 |
| kidney            | 1.026999191 | 80  | 77.89684814 |
| ear               | 1.021904479 | 125 | 122.3206304 |
| heart             | 1.019904205 | 100 | 98.04842407 |
| head              | 1.016898102 | 178 | 175.0421203 |
| inner ear         | 1.006575911 | 15  | 14.90200573 |
| white blood cells | 1.005148144 | 64  | 63.6722063  |
| intestine         | 1.004819234 | 65  | 64.68825215 |
| eye               | 0.997525076 | 129 | 129.3200573 |
| pituitary gland   | 0.994905466 | 31  | 31.15873926 |

|                           |             |     |             |
|---------------------------|-------------|-----|-------------|
| heart valve               | 0.984207558 | 55  | 55.88252149 |
| urethra                   | 0.982109034 | 26  | 26.47363897 |
| small intestine           | 0.978659601 | 49  | 50.06848138 |
| cerebellum                | 0.976457892 | 70  | 71.68767908 |
| liver                     | 0.971816455 | 61  | 62.76905444 |
| brain                     | 0.965300322 | 156 | 161.6077364 |
| diaphragm                 | 0.946241094 | 18  | 19.0226361  |
| pancreas                  | 0.94576195  | 41  | 43.3512894  |
| spinal cord               | 0.93669409  | 69  | 73.66332378 |
| abdominal wall            | 0.918193636 | 34  | 37.02922636 |
| aorta                     | 0.911094996 | 18  | 19.75644699 |
| cranial nerve             | 0.90822531  | 85  | 93.58911175 |
| peripheral nervous system | 0.898741636 | 111 | 123.5060172 |
| vulva                     | 0.898032703 | 22  | 24.49799427 |
| coagulation system        | 0.894939593 | 44  | 49.16532951 |
| olfactory bulb            | 0.880892952 | 9   | 10.21690544 |
| peripheral nerve          | 0.870362654 | 79  | 90.76676218 |
| breast                    | 0.860951658 | 26  | 30.1991404  |
| esophagus                 | 0.837471158 | 39  | 46.56876791 |
| bone marrow               | 0.836023499 | 21  | 25.11891117 |
| lacrimial apparatus       | 0.817649356 | 6   | 7.338108883 |
| spleen                    | 0.749872425 | 24  | 32.00544413 |
| gallbladder               | 0.593350011 | 7   | 11.7974212  |
| thymus                    | 0.584035254 | 3   | 5.136676218 |
| salivary gland            | 0.404468859 | 5   | 12.36189112 |
| lymph nodes               | 0.300266713 | 4   | 13.32148997 |
| lymph vessels             | 0           | 0   | 5.531805158 |

## Body Regions

| Name          | Enrichment ratio | Observed | Expected    |
|---------------|------------------|----------|-------------|
| pelvis        | 1.136745156      | 130      | 114.3616046 |
| limbs         | 1.09722235       | 137      | 124.860745  |
| thorax        | 1.078954454      | 155      | 143.6575931 |
| abdomen       | 1.024543933      | 127      | 123.9575931 |
| non-specific  | 0.99946186       | 182      | 182.0979943 |
| head and neck | 0.997757349      | 180      | 180.4045845 |

## Body Systems

| Name            | Enrichment ratio | Observed | Expected    |
|-----------------|------------------|----------|-------------|
| respiratory     | 1.176110025      | 127      | 107.9830946 |
| integumentary   | 1.141993868      | 154      | 134.8518625 |
| reproductive    | 1.109545055      | 90       | 81.11432665 |
| skeleton        | 1.06649916       | 144      | 135.0212034 |
| digestive       | 1.066384111      | 124      | 116.2808023 |
| immune          | 1.065287796      | 100      | 93.8713467  |
| urinary         | 1.023373712      | 90       | 87.94441261 |
| cardiovascular  | 1.009580616      | 126      | 124.804298  |
| skeletal muscle | 0.983817154      | 140      | 142.3028653 |
| nervous         | 0.967592336      | 165      | 170.526361  |
| endocrine       | 0.966615889      | 58       | 60.00315186 |
| lymphatic       | 0.847746878      | 39       | 46.00429799 |

| <b>P-value</b> | <b>FDR</b>  |
|----------------|-------------|
| 0.08837671     | 0.26513013  |
| 0.308608425    | 0.462912638 |
| 0.346622175    | 0.914840592 |

| <b>P-value</b> | <b>FDR</b>  |
|----------------|-------------|
| 0.074220399    | 0.244146048 |
| 0.025010453    | 0.156315329 |
| 0.003946054    | 0.04110473  |
| 0.145119321    | 0.321088029 |
| 0.114713258    | 0.289709053 |
| 0.024856036    | 0.156315329 |
| 0.165819361    | 0.345457002 |
| 0.01892226     | 0.131404581 |
| 0.005938522    | 0.053022517 |
| 0.077149087    | 0.247272715 |
| 0.044806631    | 0.202403211 |
| 0.098528139    | 0.267739508 |
| 0.34528476     | 0.522318103 |
| 0.015459551    | 0.120777745 |
| 0.234666837    | 0.425121082 |
| 0.001295795    | 0.037013887 |
| 0.001406786    | 0.037013887 |
| 0.001611076    | 0.037013887 |
| 0.090193836    | 0.257795683 |
| 0.043876991    | 0.202403211 |
| 0.129710975    | 0.300256886 |
| 0.142598653    | 0.321088029 |
| 0.205741907    | 0.401839662 |
| 0.000521077    | 0.032567285 |
| 0.101576832    | 0.270151149 |
| 0.00050907     | 0.032567285 |

|             |             |
|-------------|-------------|
| 0.002530383 | 0.037013887 |
| 0.003025985 | 0.037824812 |
| 0.14921603  | 0.321586272 |
| 0.048703108 | 0.202403211 |
| 0.002608983 | 0.037013887 |
| 0.030321616 | 0.17228191  |
| 0.003885063 | 0.04110473  |
| 0.029614218 | 0.17228191  |
| 0.047279286 | 0.202403211 |
| 0.001964296 | 0.037013887 |
| 0.062867484 | 0.219341518 |
| 0.129452362 | 0.300256886 |
| 0.090744081 | 0.257795683 |
| 0.002665    | 0.037013887 |
| 0.063170357 | 0.219341518 |
| 0.24599665  | 0.43495648  |
| 0.052466246 | 0.202403211 |
| 0.052466246 | 0.202403211 |
| 0.044809152 | 0.202403211 |
| 0.052341793 | 0.202403211 |
| 0.097792138 | 0.267739508 |
| 0.19361269  | 0.384152163 |
| 0.052962152 | 0.202403211 |
| 0.018638866 | 0.131404581 |
| 0.27957576  | 0.472256351 |
| 0.082963588 | 0.250043751 |
| 0.034693618 | 0.188552273 |
| 0.059561208 | 0.21897503  |
| 0.079890952 | 0.249659226 |
| 0.010711075 | 0.089258955 |
| 0.068652675 | 0.231934714 |
| 0.116896046 | 0.289709053 |
| 0.0840147   | 0.250043751 |
| 0.005077177 | 0.048819013 |
| 0.129402577 | 0.300256886 |
| 0.146416141 | 0.321088029 |

|             |             |
|-------------|-------------|
| 0.153320134 | 0.324830793 |
| 0.118201294 | 0.289709053 |
| 0.247055281 | 0.43495648  |
| 0.11782782  | 0.289709053 |
| 0.178760785 | 0.366313084 |
| 0.184042808 | 0.371054048 |
| 0.209207093 | 0.402321333 |
| 0.053434448 | 0.202403211 |
| 0.213895288 | 0.405104712 |
| 0.227491325 | 0.418182582 |
| 0.302654529 | 0.491322288 |
| 0.421963347 | 0.571261884 |
| 0.368791622 | 0.54234062  |
| 0.29146689  | 0.479386332 |
| 0.283675247 | 0.472792078 |
| 0.342637348 | 0.522318103 |
| 0.352984726 | 0.525274891 |
| 0.222148027 | 0.414455275 |
| 0.32217793  | 0.509775205 |
| 0.390877926 | 0.548985851 |
| 0.406707079 | 0.55866357  |
| 0.406707079 | 0.55866357  |
| 0.31079726  | 0.498072532 |
| 0.34681922  | 0.522318103 |
| 0.390236781 | 0.548985851 |
| 0.26834578  | 0.459496198 |
| 0.425018842 | 0.571261884 |
| 0.376084889 | 0.546635013 |
| 0.346197264 | 0.522318103 |
| 0.388512758 | 0.548985851 |
| 0.256097452 | 0.444613632 |
| 0.475583506 | 0.621735961 |
| 0.476325065 | 0.621735961 |
| 0.477493218 | 0.621735961 |
| 0.477532488 | 0.999564564 |
| 0.495357879 | 0.999564564 |



|             |             |
|-------------|-------------|
| 0.44712498  | 0.999564564 |
| 0.468740254 | 0.999564564 |
| 0.433486357 | 0.999564564 |
| 0.401005372 | 0.999564564 |
| 0.393672539 | 0.999564564 |
| 0.143487629 | 0.999564564 |
| 0.411226333 | 0.999564564 |
| 0.343687284 | 0.999564564 |
| 0.241359026 | 0.999564564 |
| 0.289676349 | 0.999564564 |
| 0.343825491 | 0.999564564 |
| 0.10400436  | 0.999564564 |
| 0.030127591 | 0.94148722  |
| 0.296472295 | 0.999564564 |
| 0.192325744 | 0.999564564 |
| 0.359249798 | 0.999564564 |
| 0.041681302 | 0.999564564 |
| 0.199074624 | 0.999564564 |
| 0.094718148 | 0.999564564 |
| 0.185069445 | 0.999564564 |
| 0.31916109  | 0.999564564 |
| 0.052785968 | 0.999564564 |
| 0.063772043 | 0.999564564 |
| 0.169005725 | 0.999564564 |
| 0.008014282 | 0.333928398 |
| 0.001178435 | 0.096798927 |
| 0.001548783 | 0.096798927 |

| P-value     | FDR         |
|-------------|-------------|
| 0.010494182 | 0.06296509  |
| 0.033222994 | 0.066445989 |
| 0.030930964 | 0.066445989 |
| 0.325783002 | 0.488674503 |
| 0.475691397 | 0.990301541 |
| 0.445401004 | 0.990301541 |

| <b>P-value</b> | <b>FDR</b>  |
|----------------|-------------|
| 0.002707293    | 0.016243759 |
| 0.001149481    | 0.013793773 |
| 0.096224408    | 0.288673225 |
| 0.08010305     | 0.288673225 |
| 0.127861758    | 0.306868218 |
| 0.187170713    | 0.374341425 |
| 0.381371879    | 0.646036922 |
| 0.430691281    | 0.646036922 |
| 0.350142569    | 0.999028198 |
| 0.120143686    | 0.720862115 |
| 0.378327569    | 0.999028198 |
| 0.111820352    | 0.720862115 |
